# Supplementary material for: Integrated Gradient Cu Current Collector Enables Bottom‐Up Li Growth for Li Metal Anodes: Role of Interfacial Structure
Source: PubMed Central journal article supplement (PMC10427400; doi:10.1002/advs.202301288), 2023-06-13
Supplement: ADVS-10-2301288-s001.pdf [file ADVS-10-2301288-s001.pdf]

## Supporting Information

for *Adv. Sci.*, DOI 10.1002/adv.202301288

Integrated Gradient Cu Current Collector Enables Bottom-Up Li Growth for Li Metal Anodes:  
Role of Interfacial Structure

*Yuhang Liu, Yifan Li, Zhuzhu Du\**, Chen He, Jingxuan Bi, Siyu Li, Wanqing Guan, Hongfang Du  
and Wei Ai\*

## Supporting Information

### **Integrated gradient Cu current collector enables bottom-up Li growth for Li metal anodes: role of interfacial structure**

*Yuhang Liu, Yifan Li, Zhuzhu Du,\* Chen He, Jingxuan Bi, Siyu Li, Wanqing Guan, Hongfang Du and Wei Ai\**

Mr. Y. Liu, Mr. Y. Li, Dr. Z. Du, Mr. C. He, Mr. J. Bi, Ms. S. Li, Ms. W. Guan, Prof. W. Ai  
Frontiers Science Center for Flexible Electronics and Shaanxi Institute of Flexible Electronics,  
Northwestern Polytechnical University, 127 West Youyi Road, Xi'an 710072, China.

E-mail: [iamzzdu@nwpu.edu.cn](mailto:iamzzdu@nwpu.edu.cn), [iamwai@nwpu.edu.cn](mailto:iamwai@nwpu.edu.cn)

Prof. H. Du

Fujian Cross Strait Institute of Flexible Electronics (Future Technologies), Fujian Normal  
University, Fuzhou 350117, China.

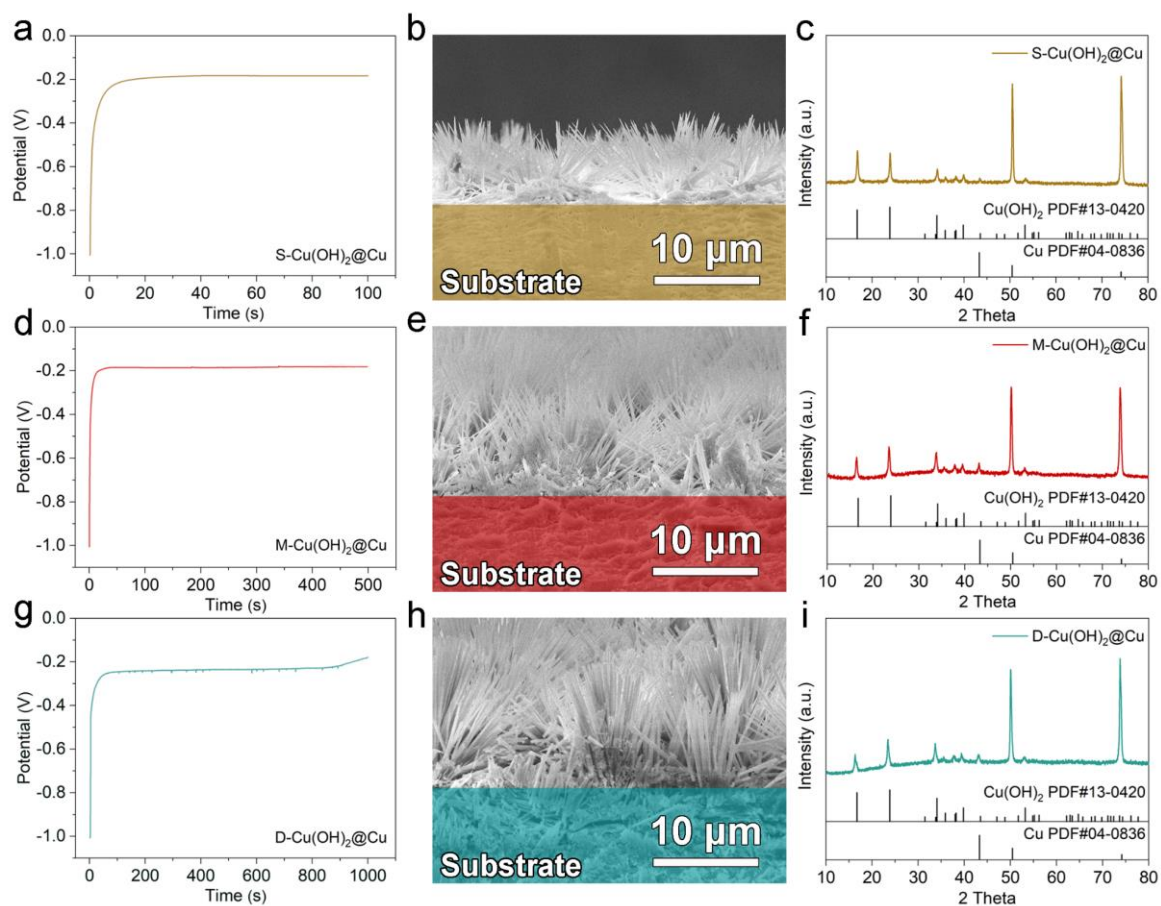

**Figure S1.** The preparation and characteristics of (a-c) S-Cu(OH)<sub>2</sub>@Cu, (d-f) M-Cu(OH)<sub>2</sub>@Cu and (g-i) D-Cu(OH)<sub>2</sub>@Cu: (a, d, g) curves of galvanostatic anodization, (b, e, h) SEM images and (c, f, i) XRD patterns.

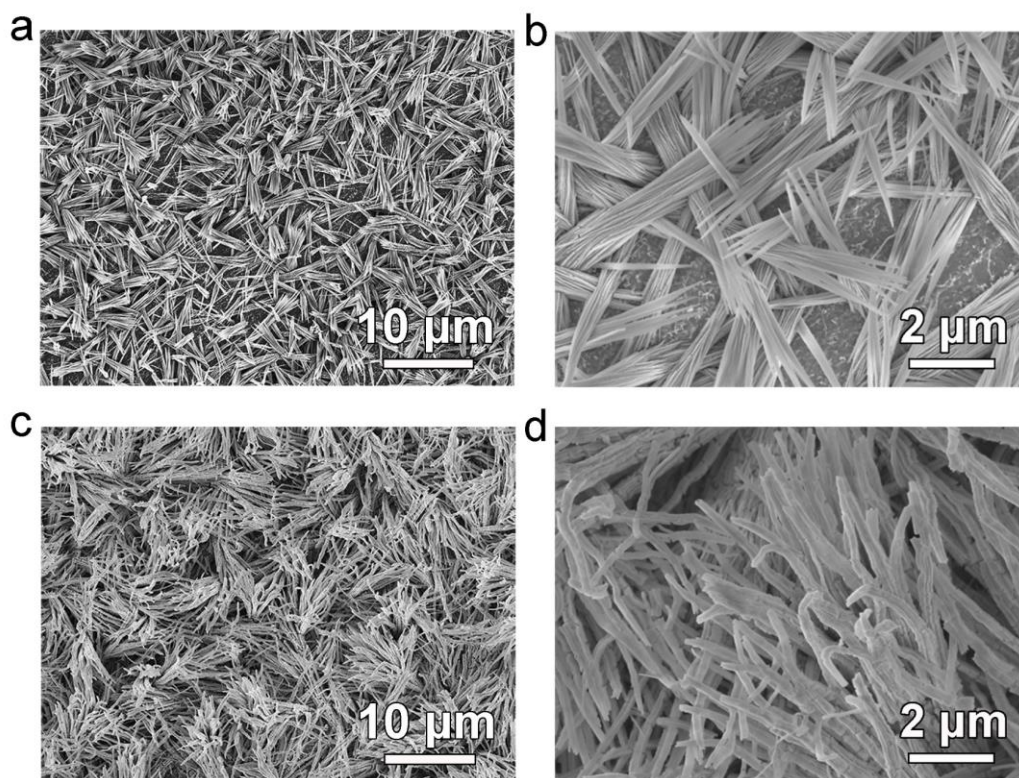

**Figure S2.** Surface SEM images of (a, b) S-CuO@Cu and (c, d) D-CuO@Cu nanowire arrays.

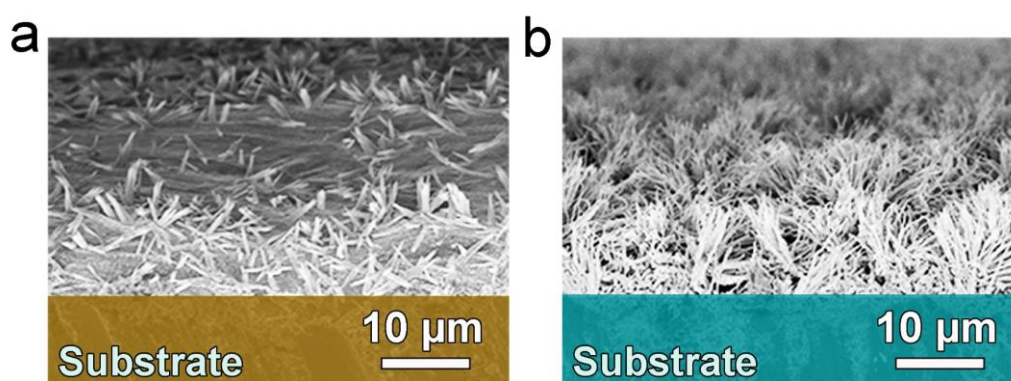

**Figure S3.** Cross-section SEM images of (a) S-CuO@Cu and (b) D-CuO@Cu nanowire arrays.

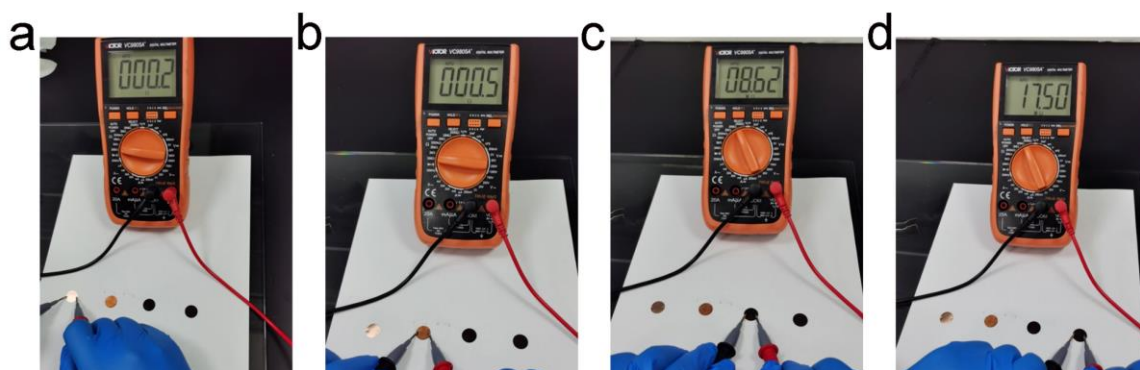

**Figure S4.** Digital photographs of resistance measures with digital multimeter for (a) bare Cu, (b) S-CuO@Cu, (c) M-CuO@Cu, (d) D-CuO@Cu nanowire arrays. All samples were punched into a circle with a diameter of 12 mm and the two test probes were maintained at a fixed length of 10 mm.

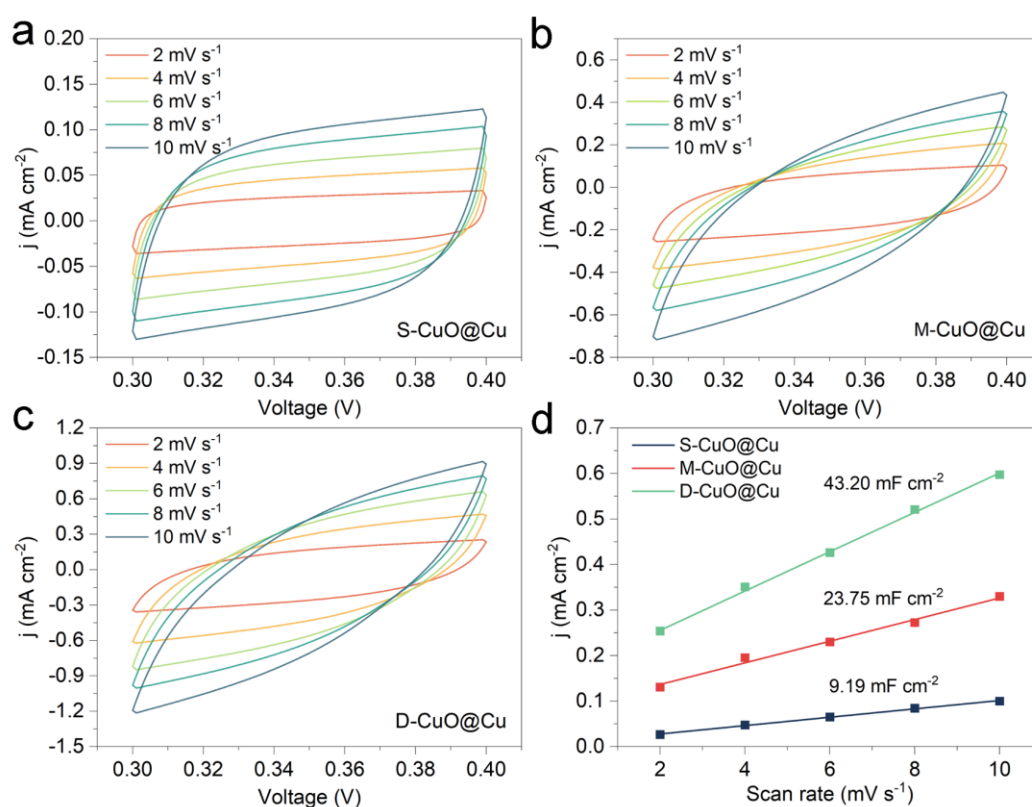

**Figure S5.** Cyclic voltammetry tests of half cells based on the (a) S-CuO@Cu, (b) M-CuO@Cu, (c) D-CuO@Cu electrodes at programmed scan rates. (d) The estimation of  $C_{dl}$  by plotting the current density variation against scan rate.



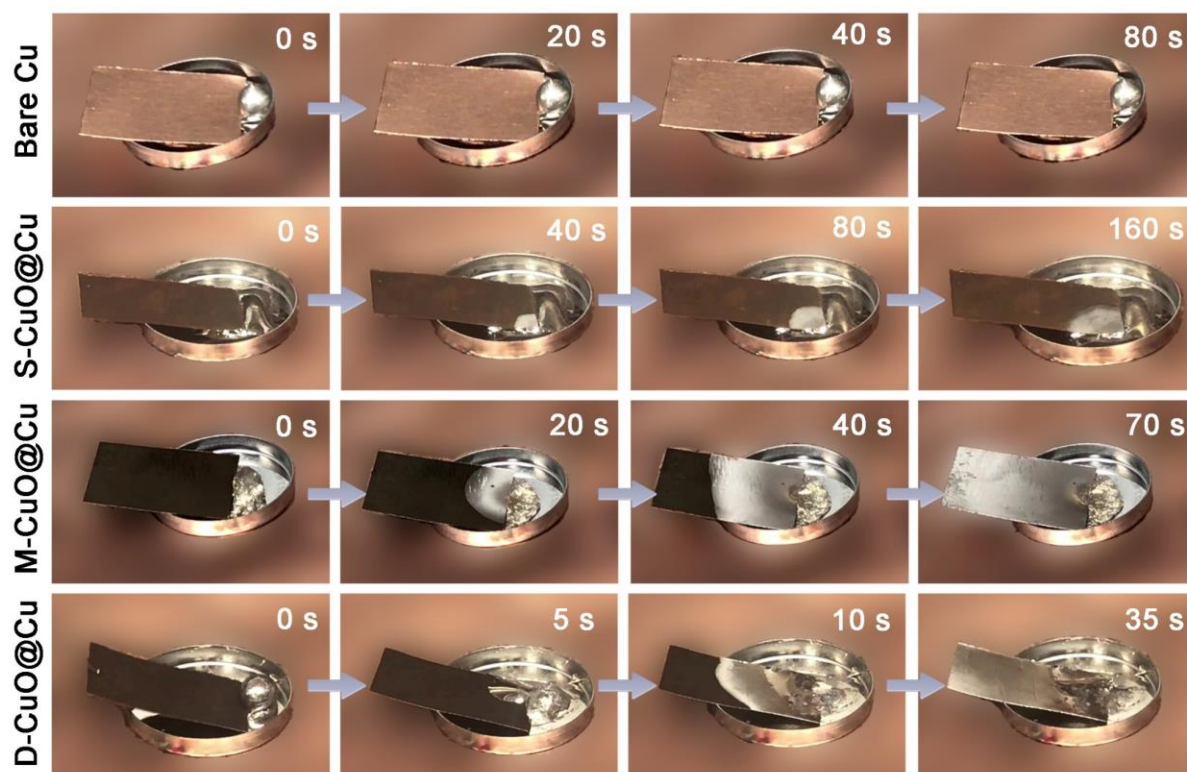

**Figure S6.** Digital photographs of molten Li infusion. All procedures were conducted on a hotplate with 300 °C in an argon-filled glove box.

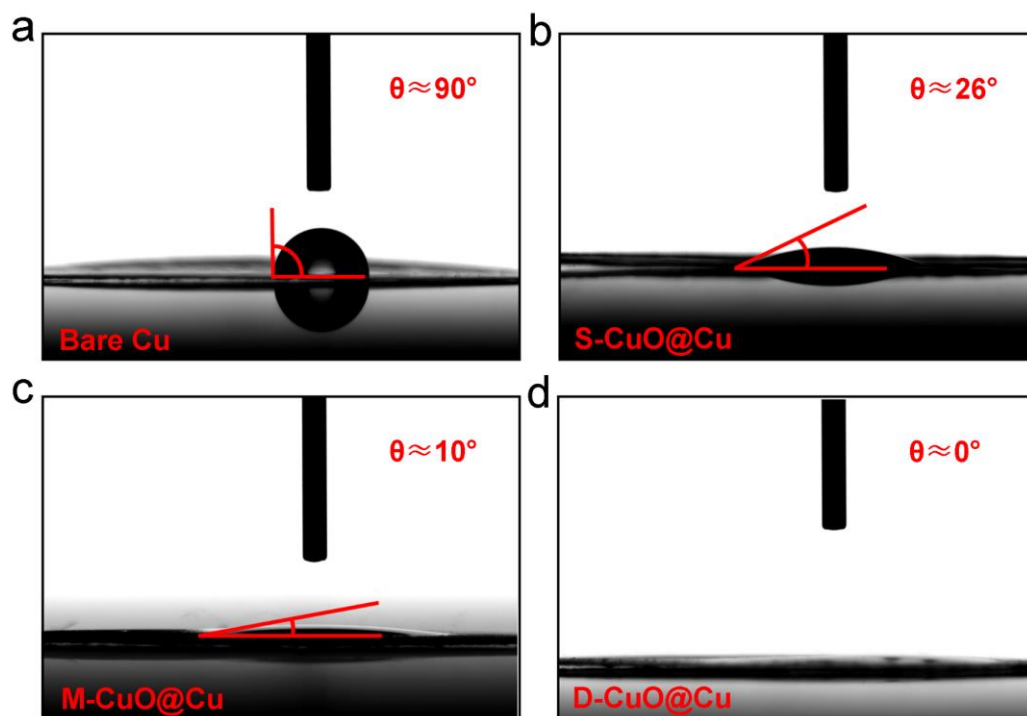

**Figure S7.** Contact angle tests of (a) bare Cu, (b) S-CuO@Cu, (c) M-CuO@Cu and (d) D-CuO@Cu nanowire arrays with the electrolyte solution.

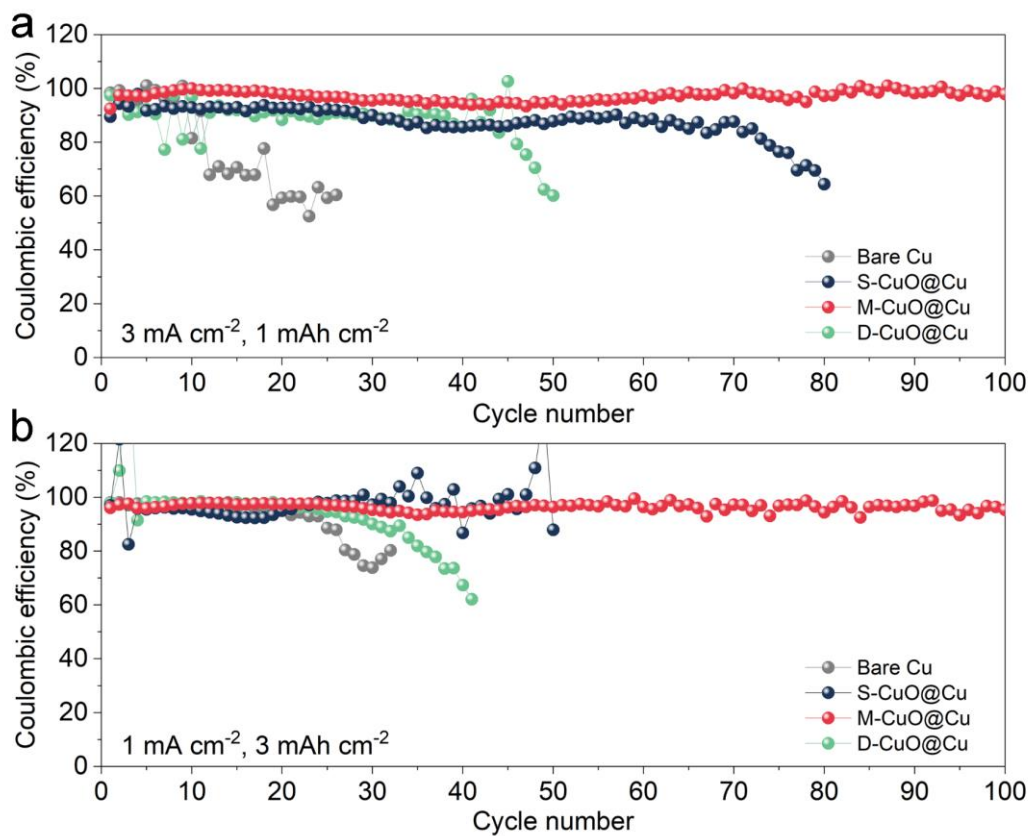

**Figure S8.** Comparison of CE for different electrodes at the (a)  $3 \text{ mA cm}^{-2}$  for  $1 \text{ mAh cm}^{-2}$  and (b)  $1 \text{ mA cm}^{-2}$  for  $3 \text{ mAh cm}^{-2}$ .

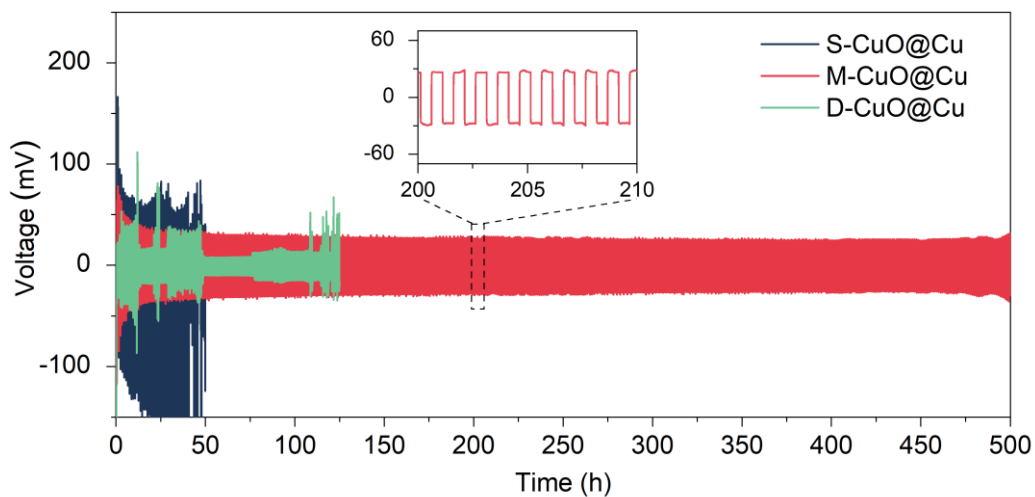

**Figure S9.** Cycling performance of symmetric cells based on different electrodes at  $2 \text{ mA cm}^{-2}$  for  $1 \text{ mAh cm}^{-2}$ .

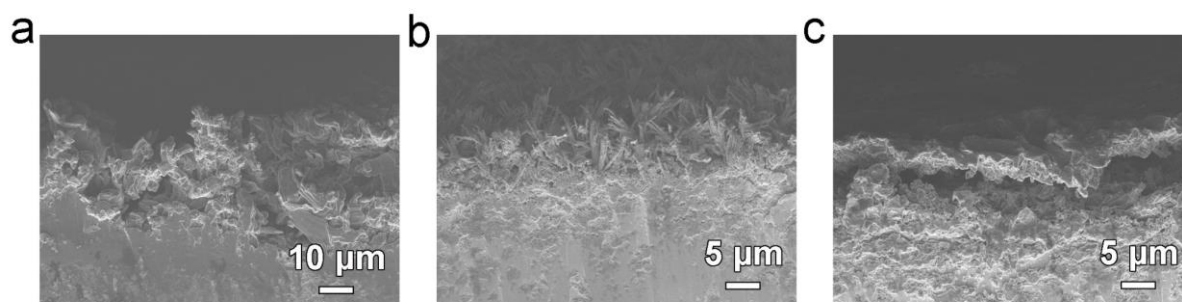

**Figure S10.** Cross-section SEM images of (a) S-CuO@Cu-Li, (b) M-CuO@Cu-Li, and (c) D-CuO@Cu-Li based on symmetric cells after 200 cycles at  $1 \text{ mA cm}^{-2}$  and  $1 \text{ mAh cm}^{-2}$ .

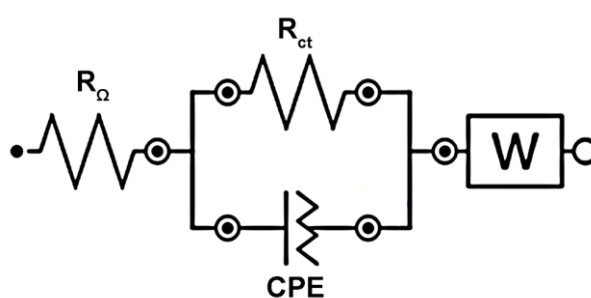

**Figure S11.** The equivalent circuit used for EIS analyses.

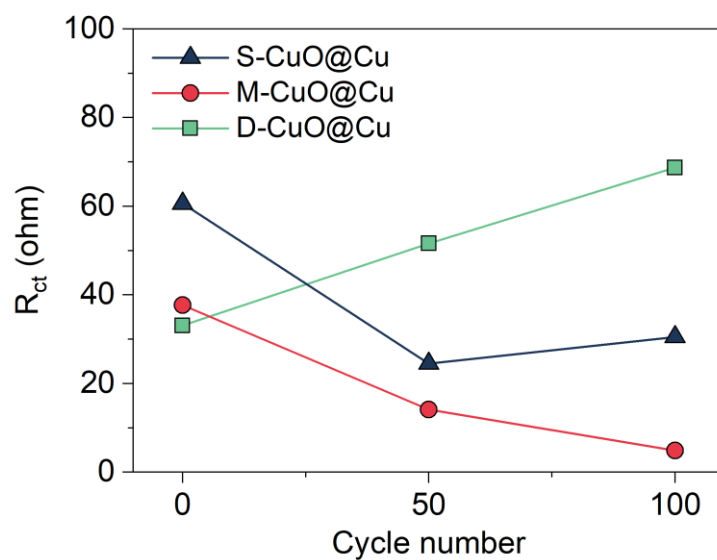

**Figure S12.** Change in  $R_{ct}$  of different electrodes before cycling, and after 50th and 100th cycles.



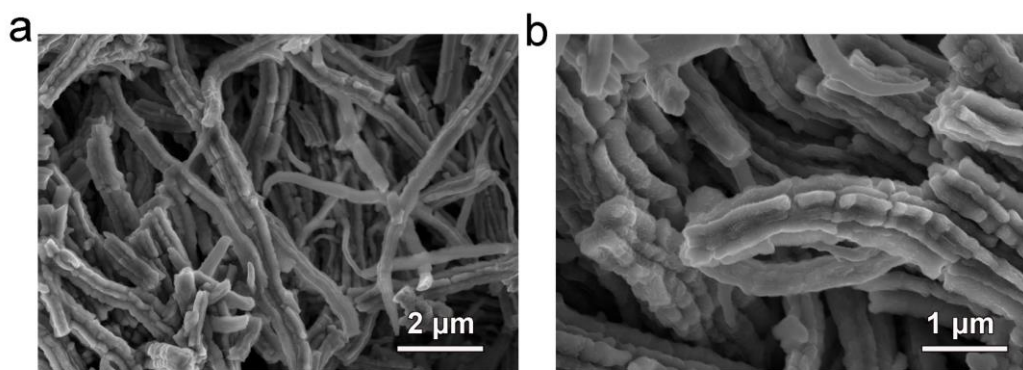

**Figure S13.** (a, b) SEM images of M-CuO@Cu after  $0.25 \text{ mAh cm}^{-2}$  Li plating at  $0.25 \text{ mA cm}^{-2}$ .

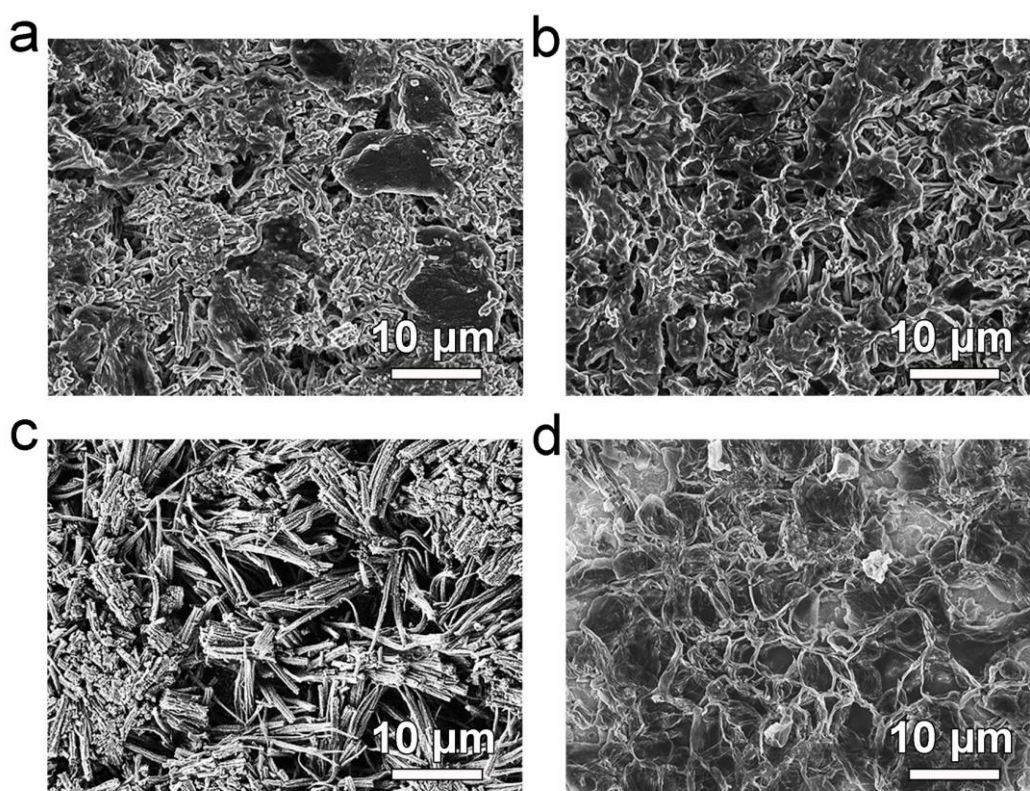

**Figure S14.** SEM images of (a) bare Cu, (b) S-CuO@Cu, (c) M-CuO@Cu, (d) D-CuO@Cu after  $3 \text{ mAh cm}^{-2}$  Li plating and then fully stripping at  $0.25 \text{ mA cm}^{-2}$ .

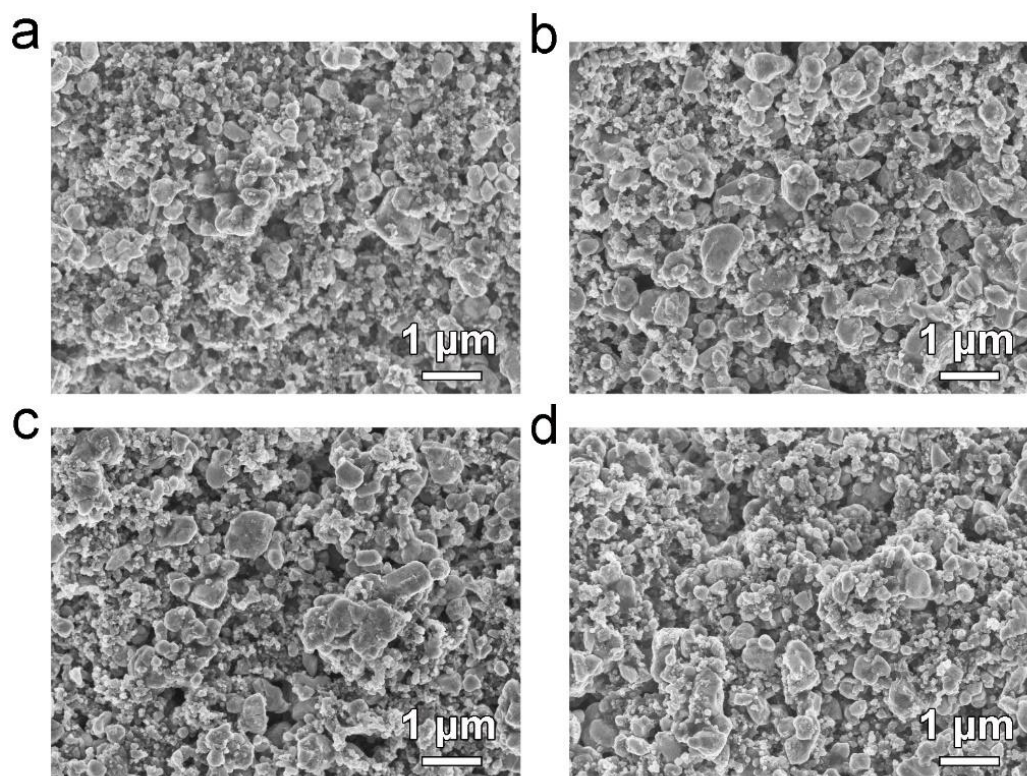

**Figure S15.** SEM images of the (a) pristine and (b-d) cycled LFP cathodes after 150 cycles at 1 C based on (b) LFP || S-CuO@Cu-Li, (c) LFP || M-CuO@Cu-Li, and (d) LFP || D-CuO@Cu-Li full cells.

**Table S1.** Comparison of cycling performance of symmetric cells based on functionalized Cu current collectors.

| Current Collector                                                       | Current density<br>(mA cm <sup>-2</sup> ) | Areal capacity<br>(mAh cm <sup>-2</sup> ) | Cycling time<br>(h) | Overpotential<br>(mV) | Ref.             |
|-------------------------------------------------------------------------|-------------------------------------------|-------------------------------------------|---------------------|-----------------------|------------------|
| 3D porous Cu current collector                                          | 1                                         | 1                                         | 400                 | ~20                   | [1]              |
| 3D porous Cu current collector                                          | 1                                         | 1                                         | 800                 | ~11                   | [2]              |
|                                                                         | 2                                         | 1                                         | 535                 | ~15                   |                  |
| 3D porous Cu current collector                                          | 0.2                                       | 1                                         | 1000                | ~26                   | [3]              |
| 3D Cu current collector with submicron skeleton                         | 0.2                                       | 1                                         | 600                 | ~50                   | [4]              |
| 3D duplex Cu current collector                                          | 0.5                                       | 1                                         | 960                 | ~13                   | [5]              |
|                                                                         | 1                                         | 1                                         | 880                 | ~17                   |                  |
| Cu-CuO-Ni current collector                                             | 0.5                                       | 0.5                                       | 580                 | ~12                   | [6]              |
| Cu foil-supported Cu <sub>3</sub> P nanowires                           | 1                                         | 1                                         | 1000                | ~30                   | [7]              |
|                                                                         | 2                                         | 2                                         | 450                 | ~30                   |                  |
| MOF-derived carbon framework/Ag deposited Cu current collector          | 0.4                                       | 0.4                                       | 500                 | ~20                   | [8]              |
| N-doped CuO nanosheet-decorated Cu current collector                    | 1                                         | 1                                         | 600                 | 23.1                  | [9]              |
| Vertically aligned carbon nanofiber array grown on Cu current collector | 1                                         | 2                                         | 500                 | ~35                   | [10]             |
| <b>M-CuO@Cu current collector</b>                                       | <b>1</b>                                  | <b>1</b>                                  | <b>1200</b>         | <b>10</b>             | <b>This work</b> |
|                                                                         | <b>2</b>                                  | <b>1</b>                                  | <b>500</b>          | <b>24</b>             |                  |

## References

- [1] H. Zhao, D. Lei, Y. He, Y. Yuan, Q. Yun, B. Ni, W. Lv, B. Li, Q. Yang, F. Kang, J. Lu, *Adv. Energy Mater.* **2018**, 8, 1800266.
- [2] H. Qiu, T. Tang, M. Asif, X. Huang, Y. Hou, *Adv. Funct. Mater.* **2019**, 29, 1808468.
- [3] Q. Yun, Y. He, W. Lv, Y. Zhao, B. Li, F. Kang, Q. Yang, *Adv. Mater.* **2016**, 28, 6932.
- [4] C. Yang, Y. Yin, S. Zhang, N. Li, Y. Guo, *Nat. Commun.* **2015**, 6, 8058.
- [5] K. Lin, T. Li, S. Chiang, M. Liu, X. Qin, X. Xu, L. Zhang, F. Kang, G. Chen, B. Li, *Small* **2020**, 16, 2001784.
- [6] S. Wu, Z. Zhang, M. Lan, S. Yang, J. Cheng, J. Cai, J. Shen, Y. Zhu, K. Zhang, W. Zhang, *Adv. Mater.* **2018**, 30, 1705830.
- [7] P. Zhai, Y. Wei, J. Xiao, W. Liu, J. Zuo, X. Gu, W. Yang, S. Cui, B. Li, S. Yang, Y. Gong, *Adv. Energy Mater.* **2020**, 10, 1903339.
- [8] J. Yun, H. Rim Shin, E. Won, H. Chol Kang, J. Lee, *Chem. Eng. J.* **2022**, 430, 132897.
- [9] J. Luan, Q. Zhang, H. Yuan, D. Sun, Z. Peng, Y. Tang, X. Ji, H. Wang, *Adv. Sci.* **2019**, 6, 1901433.
- [10] Y. Chen, A. Elangovan, D. Zeng, Y. Zhang, H. Ke, J. Li, Y. Sun, H. Cheng, *Adv. Funct. Mater.* **2020**, 30, 1906444.
